# Supplementary material for: Novel benzodithiophene unit with an alkylthiobiphenyl side chain for constructing high-efficiency polymer solar cells
Source: Royal Society of Chemistry journal article supplement (doi:10.1039/c9tc01082c), 2019-01-01
Supplement: c9tc01082c1.pdf [file c9tc01082c1.pdf]

## Electronic Supplementary Information for

### Journal of Materials Chemistry C

#### Novel benzodithiophene unit with alkylthiobiphenyl side chain for constructing high-efficiency polymer solar cells

Xiaoming Li, ‡<sup>a,c</sup> Gongyue Huang, ‡<sup>c</sup> Huanxiang Jiang,<sup>c</sup> Shanlin Qiao,<sup>\*a</sup> Xiao Kang,<sup>a,c</sup> Weichao Chen,<sup>\*b</sup>  
Renqiang Yang<sup>\*c</sup>

<sup>a</sup> College of Chemistry and Pharmaceutical Engineering, Hebei University of Science and Technology, Shijiazhuang 050018, China

\*E-mail: qiaosl@qibebt.ac.cn

<sup>b</sup> College of Textiles & Clothing, Qingdao University, Qingdao 266071, China

\*E-mail: chenwc@qdu.edu.cn

<sup>c</sup> Qingdao Institute of Bioenergy and Bioprocess Technology, Chinese Academy of Sciences, 189 Songling Road, Qingdao 266101, China

\*Email: [yangrq@qibebt.ac.cn](mailto:yangrq@qibebt.ac.cn)

‡Dual Contributors

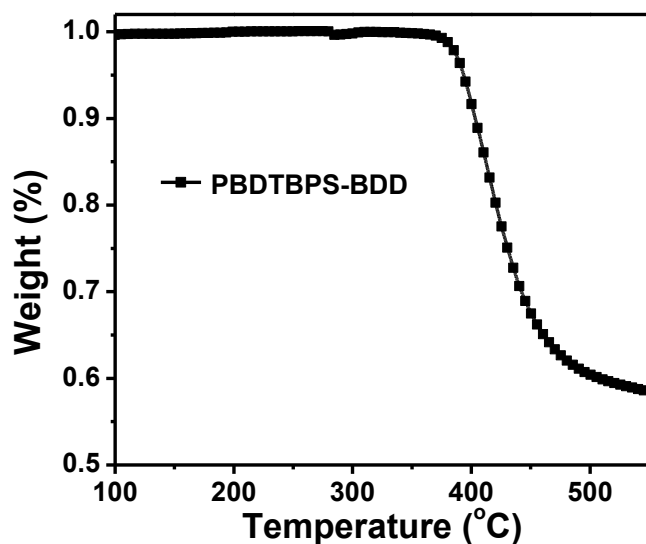

Fig. S1 TGA plots of PBDTBPS-BDD with a heating rate of 10 °C/min under an inert atmosphere.

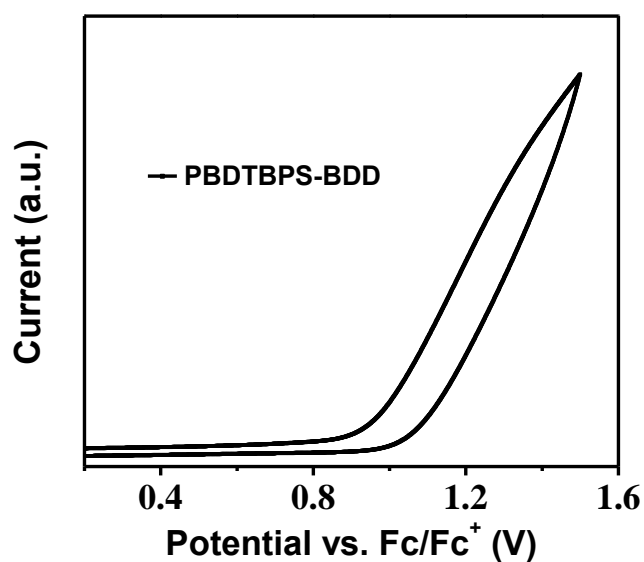

Fig. S2 Curves of PBDTBPS-BDD as casted film vs. Fc/Fc<sup>+</sup> in acetonitrile solution.

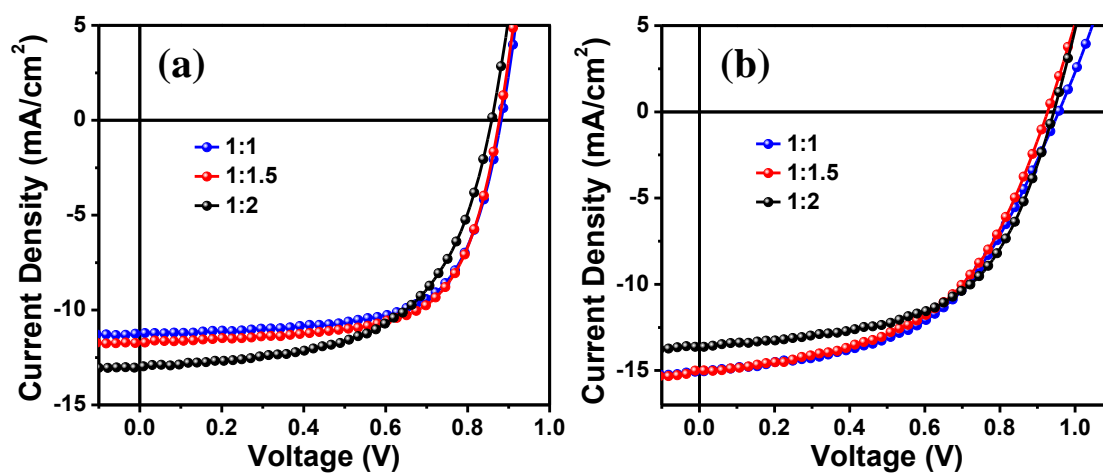

Fig. S3 (a) The J-V curves of PC<sub>71</sub>BM-based devices with different polymer/ PC<sub>71</sub>BM ratios (b) The J-V curves of ITIC-based devices with different polymer/ ITIC ratios.

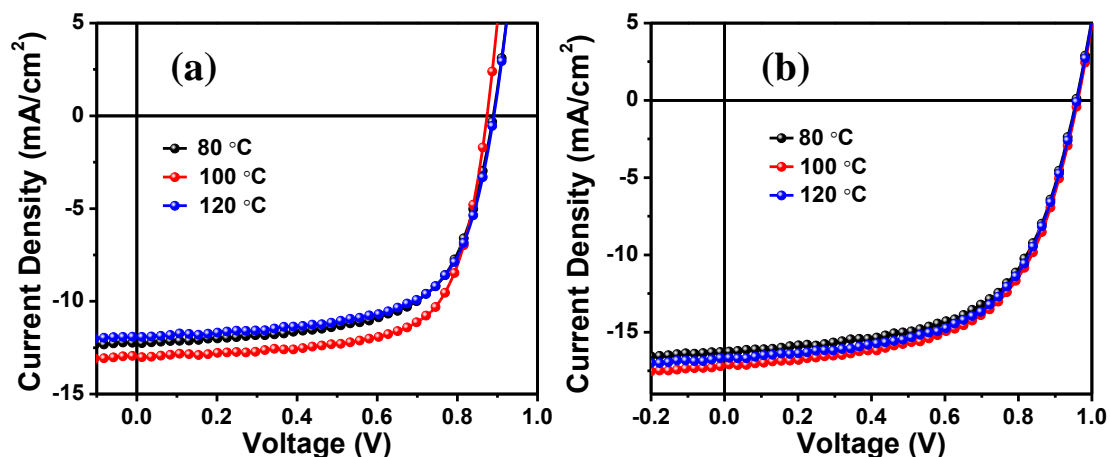

Fig. S4 (a) The J-V cures of PC<sub>71</sub>BM-based devices with different annealing temperature (b) The J-V cures of ITIC-based devices with different annealing temperature.

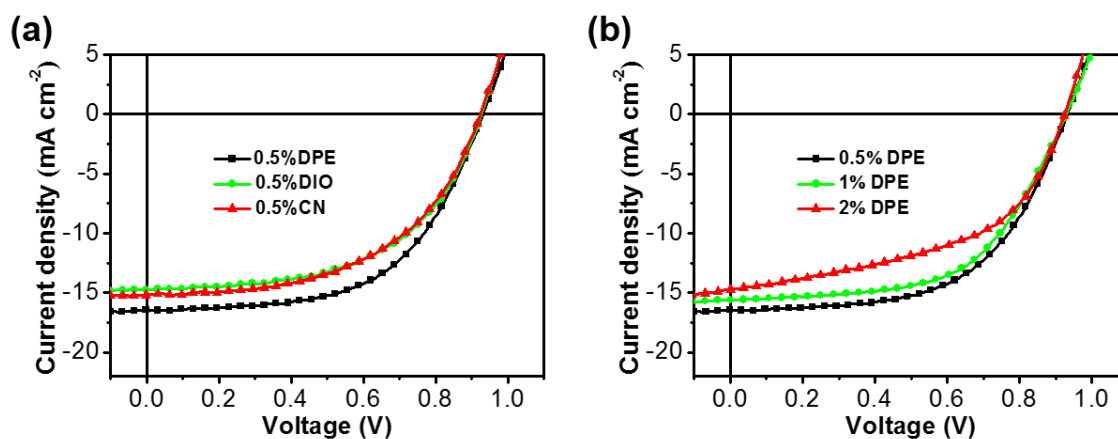

Fig. S5 (a) The J-V cures of ITIC-based devices with different additive.

Table S1. The device parameters of the PBDBTBPB–BDD: ITIC (1:1) based devices with different additive.

|                       | Annealing   | additive | $V_{oc}$ | $J_{sc}$               | FF    | PCE  |
|-----------------------|-------------|----------|----------|------------------------|-------|------|
|                       | temperature |          |          |                        |       |      |
|                       | (°C)        | (v/v)    | (V)      | (mA cm <sup>-2</sup> ) | (%)   | (%)  |
| PBDBTBPB-<br>BDD:ITIC | 100         | 0.5%DPE  | 0.93     | 16.49                  | 56.83 | 8.72 |
|                       | 100         | 0.5%DIO  | 0.92     | 14.72                  | 54.61 | 7.44 |
|                       | 100         | 0.5% CN  | 0.92     | 15.17                  | 52.64 | 7.37 |
|                       | 100         | 1%DPE    | 0.92     | 15.43                  | 54.92 | 7.80 |
|                       | 100         | 2%DPE    | 0.92     | 14.72                  | 50.64 | 6.86 |

**Table S2.** The charge carrier mobilities of the optimal blend films.

| Device                          | $\mu_e$ (cm <sup>2</sup> /Vs) | <i>thickness</i><br>(nm) | $\mu_h$ (cm <sup>2</sup> /Vs) | <i>thickness</i><br>(nm) | $\mu_h/\mu_e$ |
|---------------------------------|-------------------------------|--------------------------|-------------------------------|--------------------------|---------------|
| PBDTBPS–BDD:PC <sub>71</sub> BM | $5.93 \times 10^{-4}$         | 120                      | $5.25 \times 10^{-4}$         | 115                      | 0.89          |
| PBDTBPS–BDD:ITIC                | $1.02 \times 10^{-4}$         | 100                      | $1.45 \times 10^{-4}$         | 105                      | 1.42          |
